# Supplementary material for: Copper(ii)-responsive gel–sol phase transition in supramolecular gel systems of salen-appended sorbitol
Source: Royal Society of Chemistry journal article supplement (doi:10.1039/c3tc31595a), 2013-01-01
Supplement: c3tc31595a.pdf [file c3tc31595a.pdf]

*Electronic Supplementary Information for*

**Copper (II)-response Gel-Sol Phase Transition in Supramolecular Gel Systems of Salen-appended Sorbitol**

Kaiqi Fan, Jian Song, Jingjing Li, Xidong Guan, Naimin Tao, Ciqing Tong, Huahua Shen and Libo Niu\*

*School of Chemical Engineering and Technology, Tianjin University,  
Tianjin, 300072, P. R. China. E-mail: niulibo@tju.edu.cn*

| <b>Contents</b>                                                  | <b>page number</b> |
|------------------------------------------------------------------|--------------------|
| <b>1. General information</b>                                    | <b>2</b>           |
| <b>2. Synthetic procedures and characterization</b>              | <b>2</b>           |
| <b>3. Gelation tests</b>                                         | <b>4</b>           |
| <b>4. General procedure for UV/vis experiments</b>               | <b>4</b>           |
| <b>5. Variable temperature <sup>1</sup>H NMR spectra</b>         | <b>4</b>           |
| <b>6. UV spectra and <sup>1</sup>H NMR titration experiments</b> | <b>5</b>           |
| <b>7. Additional references</b>                                  | <b>7</b>           |

## 1. General information

The reagents used in the study were purchased from Tianjin Chemical Reagent Factory. All solvents were purified and dried by standard procedures and distilled prior to use.  $^1\text{H}$  NMR spectroscopy was performed on a Bruker DRX 400 apparatus at 400 MHz. Chemical shifts, in ppm, are referred to TMS as internal standard.  $^1\text{H}$  NMR of a solution and a gel was measured in  $[\text{D}_6]\text{DMSO}/\text{D}_2\text{O}$  (V/V=1/1).  $^1\text{H}$  NMR titration of **1** with  $\text{Cu}^{2+}$  was performed in  $[\text{D}_6]\text{DMSO}$ . UV spectroscopy was performed on a Jasco V-570 UV/vis/NIR spectrophotometer. The path length of the quartz cell was 1 mm. Fluorescence emission spectra were recorded on a Hitachi F-2500 fluorimeter. The excitation slit and emission slit were set to a 10 nm bandpass. The scanning electron microscope (SEM) was performed on a Hitachi S-4800 (Hitachi, Japan) microscope. Compounds **3** and **4** were easily synthesized by reacting the appropriate D-sorbitol with p-nitrobenzaldehyde using the method previously reported in the literature.<sup>1</sup>

## 2. Synthetic procedures and characterization

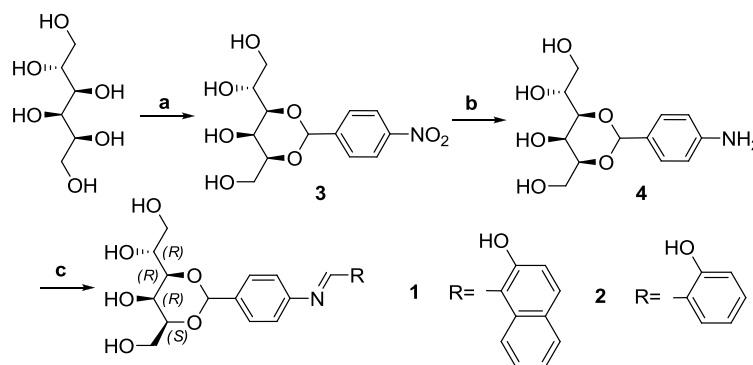

(a) p-NO<sub>2</sub>C<sub>6</sub>H<sub>4</sub>CHO, H<sub>2</sub>SO<sub>4</sub>, 50%, CH<sub>2</sub>Cl<sub>2</sub>, CTAB, 22 h, rt; (b) NH<sub>2</sub>NH<sub>2</sub> · H<sub>2</sub>O, Ni-Raney, dioxane, 16 h, 60 °C; (c) RCHO, C<sub>2</sub>H<sub>5</sub>OH, 4 h, reflux.

### 2.1 Synthetic procedure for 2:4-(4-nitrobenzylidene)-D-sorbitol (compound 3)

A mixture of D-sorbitol (10.0 g, 55 mmol) and CTAB (0.1g) dissolved in H<sub>2</sub>SO<sub>4</sub> (50%, 20 mL) and p-nitrobenzaldehyde (8.3 g, 55 mmol) dissolved in CH<sub>2</sub>Cl<sub>2</sub> (30 mL) was stirred at room temperature for 22 h. The resulted suspension was filtered and the precipitate was washed several times with H<sub>2</sub>O, CH<sub>2</sub>Cl<sub>2</sub> and dried, then recrystallized with water to get white powdery product **3** (8.3 g, 47%).

### Compound 3

m.p. 194-196 °C; IR (KBr)  $\nu$  = 3333, 2879, 1637, 1608, 1523, 1400, 1348, 1101, 1026, 856 and 705 cm<sup>-1</sup>.  $^1\text{H}$  NMR (DMSO-d<sub>6</sub>, 400 MHz):  $\delta$  = 8.25 (d,  $J$  = 8.8 Hz, 2H, Ar-H), 7.77 (d,  $J$  = 8.7 Hz, 2H, Ar-H), 5.71 (s, 1H, benzylidene-H), 4.74 (d,  $J$  = 5.6 Hz, 1H, OH), 4.71 (d,  $J$  = 5.7 Hz, 1H, OH), 4.52 (d,  $J$  = 7.9 Hz, 1H, OH), 4.45 (t,  $J$  = 5.8 Hz, 1H, OH), 3.87 (t,  $J$  = 6.0 Hz, 1H, CH), 3.61-3.56 (m, 6H, 2CH, 2CH<sub>2</sub>), 3.46-3.41 (m, 1H, CH). Anal. Calcd for 1 (C<sub>24</sub>H<sub>25</sub>NO<sub>7</sub>): 65.59% C, 5.73% H, 3.19% N; Found: 65.67% C, 5.75% H, 3.25% N;  $R_f$  (1:4 hexanes / ethyl acetate) = 0.25.

### 2.2 Synthetic procedure for 2:4-(4-aminobenzylidene)-D-sorbitol (compound 4)

To a stirred solution of compound **3** (1.4 g, 4.4 mmol) in 30 mL dioxane kept at 60 °C, freshly

prepared Ni-Raney (0.03 g) was added and then dropwise,  $\text{NH}_2\text{NH}_2 \cdot \text{H}_2\text{O}$  (3 mL) in 30 min. The reaction mixture was stirred for 16 h at 60 °C, cooled and the catalyst removed by filtration. The filtrate was concentrated under reduced pressure and the residue was taken in  $\text{CHCl}_3$  (15 mL) and sonicated until precipitates. The solid was filtered and washed several times with  $\text{CHCl}_3$ . Thus compound **4** (0.9 g, 72%) was obtained as white flocculent crystals.

### Compound 4

m.p. 189-190 °C; IR (KBr)  $\nu = 3504, 3308, 2945, 1637, 1618, 1521, 1400, 1265, 1104, 1049, 867$  and  $624 \text{ cm}^{-1}$ .  $^1\text{H NMR}$  (DMSO- $d_6$ , 400 MHz):  $\delta = 7.11$  (d,  $J = 8.4$  Hz, 2H, Ar-H), 6.50 (d,  $J = 8.4$  Hz, 2H, Ar-H), 5.35 (s, 1H, benzylidene-H), 5.10 (s, 2H,  $\text{NH}_2$ ), 4.67 (d,  $J = 5.9$  Hz, 1H, OH), 4.62 (t,  $J = 5.6$  Hz, 1H, OH), 4.38 (t,  $J = 5.7$  Hz, 1H, OH), 4.25 (d,  $J = 8.0$  Hz, 1H, OH), 3.73 (t,  $J = 6.0$  Hz, 1H, CH), 3.66 (t,  $J = 7.2$  Hz, 1H, CH), 3.59-3.55 (m, 4H,  $\text{CH}_2$ ), 3.53-3.48 (m, 1H, CH), 3.39 (t,  $J = 6.0$  Hz, 1H, CH). Anal. Calcd for **1** ( $\text{C}_{24}\text{H}_{25}\text{NO}_7$ ): 65.59% C, 5.73% H, 3.19% N; Found: 65.67% C, 5.75% H, 3.25% N;  $R_f$  (1:4 hexanes / ethyl acetate) = 0.21.

### 2.3 General procedure for the synthesis of the salen derivatives (1 and 2)

2-hydroxy-1-naphthaldehyde (or salicylaldehyde) (0.5 g, 2.9 mmol) was added to the solution of compound **4** (0.8 g, 2.9 mmol) in ethanol (30 mL). The reaction mixture was refluxed for 4 hrs. after cooling to room temperature, yellow precipitates was filtered, washed three times with absolute ethanol and recrystallized from ethanol/water (v/v=4:1) to give **1** (or **2**).

### Compound 1

m.p. 214-216 °C; IR (KBr)  $\nu = 3390, 2937, 1623, 1604, 1493, 1401, 1282, 1097, 1016, 831$  and  $752 \text{ cm}^{-1}$ .  $^1\text{H NMR}$  (DMSO- $d_6$ , 400 MHz):  $\delta = 15.80$  (s, 1H, OH), 9.66 (s, 1H, HC=N), 8.49 (d,  $J = 8.4$  Hz, 1H, Ar-H), 7.93 (d,  $J = 9.3$  Hz, 1H, Ar-H), 7.79 (d,  $J = 7.5$  Hz, 1H, Ar-H), 7.62 (m, 4H, Ar-H), 7.36 (m, 2H, Ar-H), 7.00 (d,  $J = 9.2$  Hz, 1H, Ar-H), 5.62 (s, 1H, benzylidene-H), 4.72-4.68 (m, 2H, OH), 4.44-4.42 (m, 2H, OH), 3.84 (t,  $J = 5.8$  Hz, 1H, CH), 3.72-3.60 (m, 6H, 2CH, 2 $\text{CH}_2$ ), 3.58 (d,  $J = 8.4$  Hz, 1H, CH). ESI-MS:  $m/z = 440.3$  ( $(\text{M}+\text{H})^+$ , 100%); UV-Vis (DMSO):  $\lambda_{\text{max}}$  ( $\epsilon$ ) = 319 ( $1.01 \times 10^4$ ), 440 ( $0.85 \times 10^4$ ), 461 ( $0.82 \times 10^4$ ) nm ( $\text{cm}^{-1}\text{M}^{-1}$ ); Fluorescence (DMSO):  $\lambda_{\text{max}} = 512$  nm,  $\lambda_{\text{exc}} = 375$  nm; Anal. Calcd for **1** ( $\text{C}_{24}\text{H}_{25}\text{NO}_7$ ): 65.59% C, 5.73% H, 3.19% N; Found: 65.67% C, 5.75% H, 3.25% N;  $R_f$  (1:4 hexanes / ethyl acetate) = 0.15.

### Compound 2

m.p. 202-203 °C; IR (KBr)  $\nu = 3430, 2865, 1625, 1616, 1523, 1400, 1347, 1099, 854$  and  $748 \text{ cm}^{-1}$ .  $^1\text{H NMR}$  (DMSO- $d_6$ , 400 MHz):  $\delta = 13.07$  (s, 1H, OH), 8.98 (s, 1H, HC=N), 7.68 (d,  $J = 8.4$  Hz, 1H, Ar-H), 7.58 (d,  $J = 8.4$  Hz, 2H, Ar-H), 7.45-7.41 (m, 3H, Ar-H), 7.01-6.97 (m, 2H, Ar-H), 5.60 (s, 1H, benzylidene-H), 4.73-4.68 (m, 2H, OH), 4.45-4.41 (m, 2H, OH), 3.82 (t,  $J = 6.1$  Hz, 1H, CH), 3.79-3.53 (m, 6H, 2CH, 2 $\text{CH}_2$ ), 3.42 (d,  $J = 8.4$  Hz, 1H, CH). ESI-MS:  $m/z = 390.6$  ( $(\text{M}+\text{H})^+$ , 100%); UV-Vis (DMSO):  $\lambda_{\text{max}}$  ( $\epsilon$ ) = 320 ( $1.17 \times 10^4$ ) nm ( $\text{cm}^{-1}\text{M}^{-1}$ ); Fluorescence (DMSO):  $\lambda_{\text{max}} = 502$  nm,  $\lambda_{\text{exc}} = 338$  nm Anal. Calcd for **2** ( $\text{C}_{20}\text{H}_{23}\text{NO}_7$ ): 61.69% C, 5.95% H, 3.60% N; Found: 61.67% C, 5.75% H, 3.49% N;  $R_f$  (1:4 hexanes/ethyl acetate) = 0.17.

### 3. Gelation tests

The gels were prepared by first heating solutions containing the gelators and then cooling the solutions to room temperature. The gelation properties were evaluated by dissolving test tube inversion. The minimum gelation concentration (mgc) was determined by weighing up a minimum amount of gelator needed for the formation of a stable gel through the heat/cool cycle.<sup>2</sup> When the compound did not dissolve completely, it was labeled as “insoluble”, whereas “indicates that reprecipitation occurred with cooling.

**Table S1.** Gelation ability of **1** and **2** in various solvents.<sup>a</sup>

| solvent                         | <b>1</b> | <b>2</b> |
|---------------------------------|----------|----------|
| H <sub>2</sub> O                | P        | P        |
| methanol                        | S        | S        |
| methanol/H <sub>2</sub> O (1:1) | G (3.0)  | S        |
| ethanol                         | S        | S        |
| ethanol /H <sub>2</sub> O (1:1) | G (3.1)  | S        |
| DMSO                            | S        | S        |
| DMSO /H <sub>2</sub> O (1:1)    | G (2.7)  | S        |
| DMF                             | S        | S        |
| DMF /H <sub>2</sub> O (1:1)     | G (2.9)  | S        |
| o-xylene                        | G (6.6)  | P        |
| o-dichlorobenzene(ODCB)         | G (4.3)  | P        |
| cyclohexane                     | I        | I        |
| n-hexane                        | I        | I        |
| toluene                         | P        | P        |
| chloroform                      | I        | I        |
| butyl acetate                   | P        | P        |
| ethyl acetate                   | I        | I        |

<sup>a</sup> G, gel; P, precipitation; S, solution; I, insoluble. Numbers in parentheses present the minimal gelation concentration (mgc) in mM.

### 4. General procedure for UV/vis experiments

All UV/vis spectra were carried out just after the addition of different metal salts in DMSO/H<sub>2</sub>O (v/v=1/1) solution, while keeping the gelator **1** concentration constant. The solution of metal ions were prepared from the acetate salts of Cu<sup>2+</sup>, Ca<sup>2+</sup>, Mg<sup>2+</sup>, Mn<sup>2+</sup>, Zn<sup>2+</sup>, Ni<sup>2+</sup>, Cr<sup>2+</sup>, Fe<sup>2+</sup> and Co<sup>2+</sup>.

### 5. Variable temperature <sup>1</sup>H NMR spectra

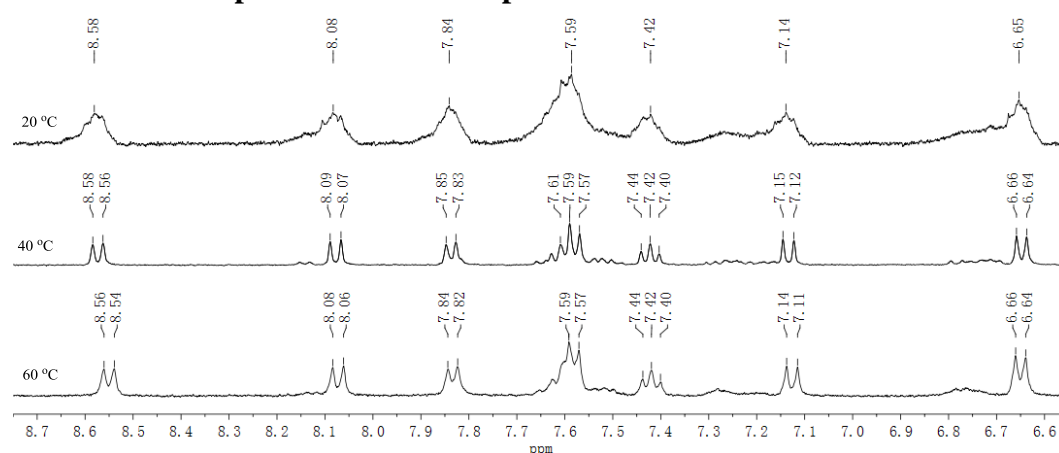

**Figure S1.** Variable temperature <sup>1</sup>H NMR spectra of **1** (3 mM) in [D<sub>6</sub>]DMSO/D<sub>2</sub>O (v/v=1/1).

## 6. UV spectra and $^1\text{H}$ NMR titration experiments

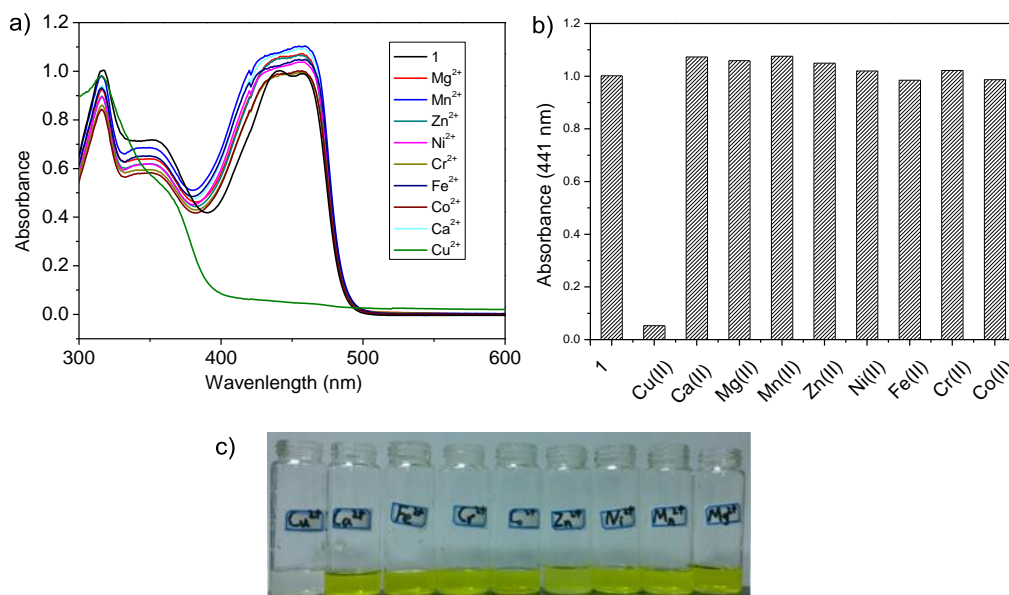

**Figure S2.** a) UV-Vis absorption of **1** ( $1 \times 10^{-4}$  M) in DMSO/H<sub>2</sub>O (v/v=1/1) upon addition of 10 equivalents of different metal cations (Cu<sup>2+</sup>, Ca<sup>2+</sup>, Mg<sup>2+</sup>, Mn<sup>2+</sup>, Zn<sup>2+</sup>, Ni<sup>2+</sup>, Cr<sup>2+</sup>, Fe<sup>2+</sup> and Co<sup>2+</sup>). b) Absorption changes at 441 nm upon addition of 10 equivalents of different metal cations. c) Color changes observed for **1** upon the addition of 10 equivalents different metal cations in DMSO/H<sub>2</sub>O (v/v=1/1). All solution acquired after 120 min at room temperature.

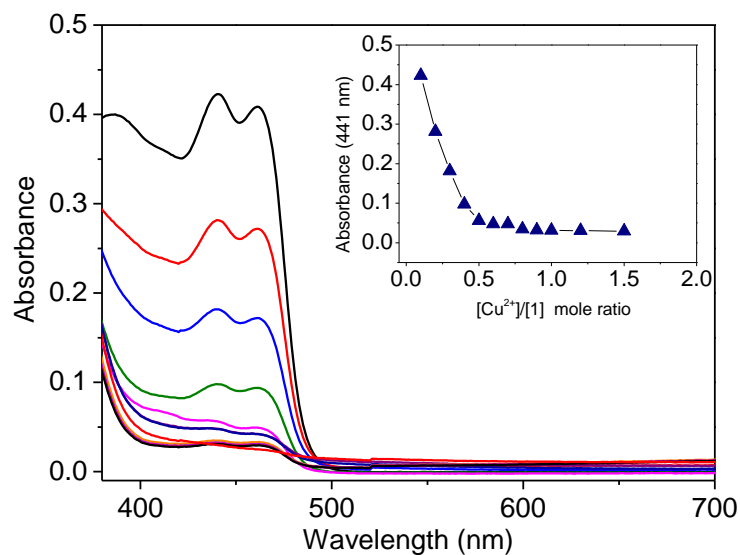

**Figure S3.** UV-Vis titration of gelator **1** ( $4 \times 10^{-5}$  M) with Cu<sup>2+</sup> in DMSO/H<sub>2</sub>O (v/v=1/1), acquired after 120 min.

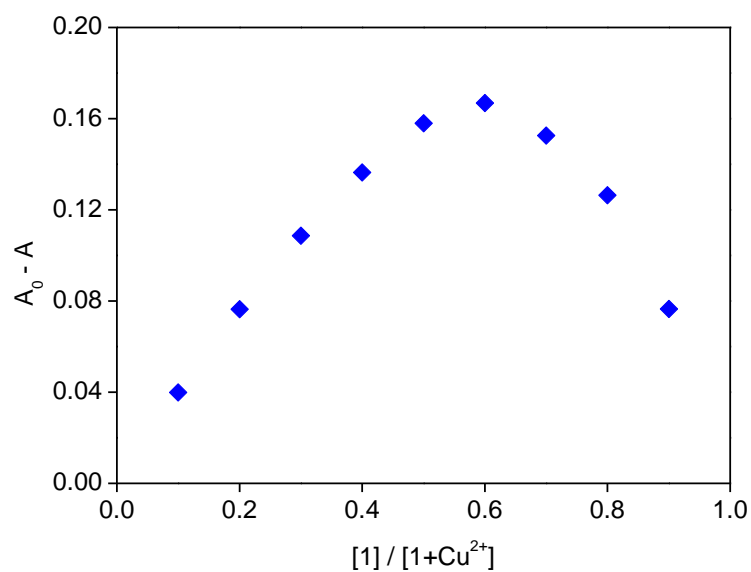

**Figure S4.** A Job plot of **1** and  $\text{Cu}^{2+}$ , indicating the 2:1 stoichiometry for **1**- $\text{Cu}^{2+}$  complex.

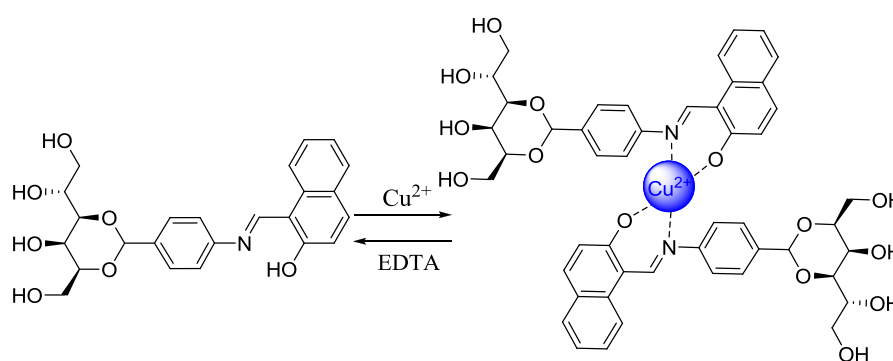

**Figure S5.** Possible binding mode of **1** with  $\text{Cu}^{2+}$ .

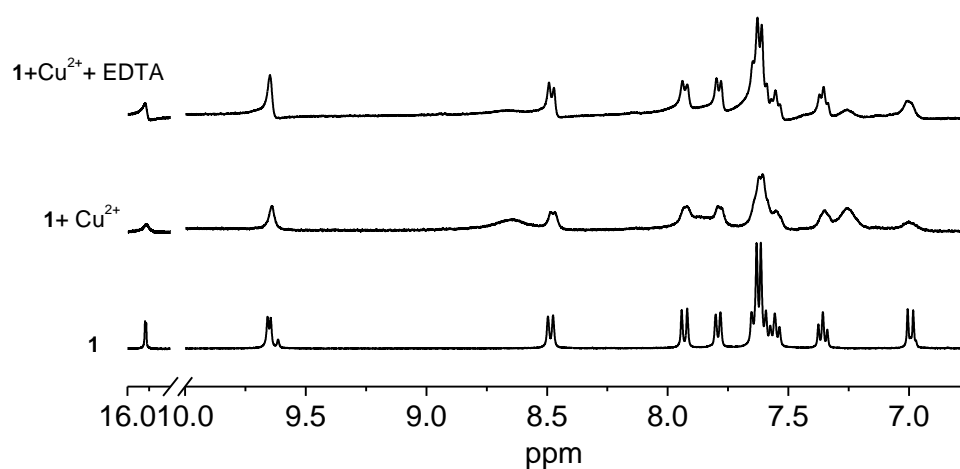

**Figure S6.**  $^1\text{H}$  NMR spectra of **1** (3 mM) in the presence of  $\text{Cu}^{2+}$  (0.5 equiv) or EDTA (0.5 equiv) in  $[\text{D}_6]\text{DMSO}$ .

## 7. Additional references

1. Kobayashi, T.; Ando, K.; Nomoto, H. New sugar compounds, e.g., 4-O-(3,4-dimethylbenzylidene)-D-sorbitol, useful as gelling agents. WO9823604-A; EP945452-A; WO9823604-A1; NO9902549-A; EP945452-A1; CN1238769-A; JP10524508-X; BR9713417-A; TW396160-A; MX9905002-A1; US6187842-B1; KR2000057275-A; MX207140-B; EP945452-B1; DE69726309-E; CN1101389-C; IN9703391-I1; IN233147-B.
2. Jingjing Li, Kaiqi Fan, Libo Niu, Yuanchao Li, and Jian Song. Effects of Salt on the Gelation Mechanism of a D-Sorbitol-Based Hydrogelator. *J. Phys. Chem. B*, 2013, 117, 5989–5995.
